# Supplementary material for: A Systematic Review on the Viruses of Anopheles Mosquitoes: The Potential Importance for Public Health
Source: MDPI journal article supplement (doi:10.3390/tropicalmed8100459), 2023-09-26
Supplement: s1 [file s1]

## Supplementary material

**Table S1.** Arboviruses and probable arbovirus detected in wild-caught *Anopheles* mosquitoes worldwide.

| Virus name/ abbreviation                 | Country     | <i>Anopheles</i> species    | References    |
|------------------------------------------|-------------|-----------------------------|---------------|
| Eastern equine encephalitis virus (EEEV) | USA         | <i>An. crucians</i>         | [22–25]       |
|                                          |             | <i>An. crucians</i> complex | [26]          |
|                                          |             | <i>An. punctipennis</i>     | [25,27,28]    |
|                                          |             | <i>An. quadrimaculatus</i>  | [23,25,27–29] |
| Tensaw virus (TENV)                      | USA         | <i>An. crucians</i>         | [22,25,30–34] |
|                                          |             | <i>An. crucians</i> complex | [26]          |
|                                          |             | <i>An. quadrimaculatus</i>  | [22,31,32]    |
| West Nile virus (WNV)                    | Israel      | <i>An. coustani</i>         | [35]          |
|                                          |             | <i>An. tenebrosus</i>       | [36]          |
|                                          | Madagascar  | <i>An. coustani</i>         | [37]          |
|                                          |             | <i>An. pauliani</i>         | [37,38]       |
|                                          | Romania     | <i>An. hyrcanus</i>         | [39]          |
|                                          |             | <i>An. maculipennis</i>     | [39]          |
|                                          | Serbia      | <i>An. maculipennis</i>     | [40]          |
|                                          | Turkey      | <i>An. claviger</i>         | [41]          |
|                                          | USA         | <i>An. atropos</i>          | [42]          |
|                                          |             | <i>An. crucians</i>         | [43]          |
|                                          |             | <i>An. franciscanus</i>     | [44]          |
|                                          |             | <i>An. punctipennis</i>     | [45–47]       |
|                                          |             | <i>An. quadrimaculatus</i>  | [43]          |
|                                          |             | <i>An. walkeri</i>          | [45]          |
| Japanese encephalitis virus (JEV)        | China       | <i>An. sinensis</i>         | [48–51]       |
|                                          | Philippines | <i>An. annularis</i>        | [52]          |
|                                          | India       | <i>An. barbirostris</i>     | [14]          |
|                                          |             | <i>An. pallidus</i>         | [14]          |
|                                          |             | <i>An. peditaeniatus</i>    | [53]          |
|                                          |             | <i>An. subpictus</i>        | [14,54,55]    |
|                                          | Indonesia   | <i>An. annularis</i>        | [56]          |
|                                          |             | <i>An. vagus</i>            | [56]          |
|                                          | Malaysia    | <i>Anopheles</i> spp.       | [57]          |
|                                          | Taiwan      | <i>An. sinensis</i>         | [58]          |
| Ross River virus (RRV)                   | Australia   | <i>An. amictus</i>          | [59–61]       |
|                                          |             | <i>An. annulipes</i>        | [62]          |
|                                          |             | <i>An. annulipes</i> s.l.   | [59]          |
|                                          |             | <i>An. bancroftii</i>       | [61]          |

|                                |                              |                              |               |
|--------------------------------|------------------------------|------------------------------|---------------|
| O'nyong'nyong virus (ONNV)     | Democratic Republic of Congo | <i>Anopheles</i> spp.        | [63]          |
|                                | Kenya                        | <i>An. funestus</i>          | [64,65]       |
|                                |                              | <i>An. gambiae</i>           | [65]          |
|                                | Uganda                       | <i>An. funestus</i>          | [65,66]       |
|                                |                              | <i>An. gambiae</i>           | [65]          |
| Cache Valley virus (CVV)       | Jamaica                      | <i>An. grabhami</i>          | [67]          |
|                                | USA                          | <i>An. punctipennis</i>      | [68,69]       |
|                                |                              | <i>An. quadrimaculatus</i>   | [68–71]       |
|                                |                              | <i>An. walkeri</i>           | [69]          |
| Rift Valley fever virus (RVFV) | Kenya                        | <i>An. squamosus</i>         | [72]          |
|                                |                              | <i>Anopheles</i> spp.        | [73]          |
|                                | Madagascar                   | <i>An. coustani</i>          | [74]          |
|                                |                              | <i>An. squamosus</i>         | [74]          |
|                                | Sudan                        | <i>An. arabiensis</i>        | [12]          |
|                                |                              | <i>An. coustani</i>          | [12]          |
| Getah virus (GETV)             | China                        | <i>An. sinensis</i>          | [50,75–78]    |
|                                | Malaysia                     | <i>Anopheles</i> spp.        | [79]          |
|                                | Rusia                        | <i>An. hyrcanus</i>          | [80]          |
| Batai virus (BATV)             | Germany                      | <i>An. daciae</i>            | [81]          |
|                                |                              | <i>An. maculipennis</i> s.l. | [82]          |
|                                |                              | <i>An. messeae</i>           | [81]          |
|                                | Italy                        | <i>An. maculipennis</i>      | [83,84]       |
| Sindbis virus (SINV)           | Australia                    | <i>An. bancroftii</i>        | [85]          |
|                                |                              | <i>An. meraukensis</i>       | [61]          |
|                                | China                        | <i>Anopheles</i> spp.        | [86]          |
|                                | Germany                      | <i>An. maculipennis</i>      | [87]          |
|                                | Kenya                        | <i>An. gambiae</i>           | [88]          |
| Banna virus (BAV)              | China                        | <i>An. sinensis</i>          | [50,77,89–91] |
| Zika virus (ZIKV)              | Brazil                       | <i>An. cruzii</i>            | [92]          |
|                                | China                        | <i>An. sinensis</i>          | [93]          |
|                                | Senegal                      | <i>An. coustani</i>          | [94]          |
| Calovo virus (CVOV)            | Austria                      | <i>An. maculipennis</i>      | [95,96]       |
|                                | Croatia                      | <i>An. maculipennis</i> s.l. | [97]          |
|                                | Slovakia                     | <i>An. maculipennis</i> s.l. | [98]          |
| Jamestown Canyon virus (JCV)   | USA                          | <i>An. crucians</i>          | [25]          |
|                                |                              | <i>An. punctipennis</i>      | [99,100]      |
|                                |                              | <i>An. walkeri</i>           | [99]          |
| Liao ning virus (LNV)          | Australia                    | <i>An. amictus</i>           | [59]          |
|                                |                              | <i>An. annulipes</i> s.l.    | [59]          |
|                                |                              | <i>An. meraukensis</i>       | [101]         |

|                                             |                          |                               |           |
|---------------------------------------------|--------------------------|-------------------------------|-----------|
| Bovine fever ephemerovirus (BEFV)           | Australia                | <i>An. bancroftii</i>         | [102,103] |
|                                             | Taiwan                   | <i>An. sinensis</i>           | [104]     |
| Saint Louis encephalitis virus (SLEV)       | USA                      | <i>An. crucians</i>           | [30,105]  |
|                                             |                          | <i>An. quadrimaculatus</i>    | [106]     |
| Sagiyama virus (SAGV)                       | Vietnam                  | <i>An. sinensis</i>           | [107]     |
|                                             |                          | <i>An. vagus</i>              | [107]     |
|                                             |                          | <i>Anopheles</i> spp.         | [107]     |
|                                             |                          |                               |           |
| Akabane virus (AKAV)                        | China                    | <i>An. sinensis</i>           | [108]     |
|                                             | Taiwan                   | <i>An. sinensis</i>           | [104]     |
|                                             | Vietnam                  | <i>An. vagus</i>              | [107]     |
| Usutu virus (USUV)                          | Italy                    | <i>An. maculipennis</i> s.l.  | [109–111] |
| Mapputta virus (MAPV)                       | Australia                | <i>An. amictus</i>            | [103]     |
|                                             |                          | <i>An. annulipes</i>          | [103]     |
|                                             |                          | <i>An. meraukensis</i>        | [112]     |
| Ngari virus (NRIV)                          | Kenya                    | <i>An. funestus</i>           | [113]     |
|                                             | Senegal                  | <i>An. gambiae</i> s.l.       | [114]     |
|                                             |                          | <i>An. pharoensis</i>         | [114]     |
| Bwamba virus (BWAV)                         | Kenya                    | <i>An. coustani</i>           | [115]     |
|                                             | Uganda                   | <i>An. funestus</i>           | [66]      |
| Jurona virus                                | Cambodia                 | <i>Anopheles</i> spp.         | [116]     |
|                                             | Senegal                  | <i>Anopheles</i> spp.         | [116]     |
| Venezuelan equine encephalitis virus (VEEV) | Mexico                   | <i>An. pseudopunctipennis</i> | [117]     |
|                                             | USA                      | <i>An. crucians</i>           | [32]      |
| Nyando virus (NDOV)                         | Kenya                    | <i>An. funestus</i>           | [118]     |
|                                             | Uganda                   | <i>An. funestus</i>           | [66]      |
| Kadipiro virus (KDV)                        | China                    | <i>An. sinensis</i>           | [77,119]  |
| Boraceia virus (BORV)                       | Brazil                   | <i>An. cruzii</i>             | [120,121] |
|                                             |                          |                               |           |
| Germiston virus (GERV)                      | Kenya                    | <i>An. funestus</i>           | [88]      |
|                                             |                          | <i>An. gambiae</i>            | [88]      |
| Chikungunya virus (CHIKV)                   | Iran                     | <i>An. maculipennis</i> s.l.  | [122]     |
|                                             | Senegal                  | <i>An. gambiae</i>            | [123]     |
| Bunyamwera virus (BUNV)                     | Kenya                    | <i>An. funestus</i>           | [113]     |
|                                             |                          | <i>An. gambiae</i>            | [124]     |
| Orungo virus (ORUV)                         | Central African Republic | <i>An. gambiae</i>            | [125]     |
|                                             | Uganda                   | <i>An. funestus</i>           | [126]     |
| Tucuruí virus (TUCV)                        | Brazil                   | <i>Anopheles</i> spp.         | [127]     |
| Yada yada virus (YYV)                       | Australia                | <i>An. annulipes</i>          | [128]     |
| Warrego virus (WARV)                        | Australia                | <i>An. annulipes</i> s.l.     | [59]      |
| Bluetongue virus (BTV)                      | Indonesia                | <i>An. vagus</i>              | [129]     |
| Tataguine virus (TATV)                      | Senegal                  | <i>An. gambiae</i>            | [130]     |
| Eubenangee virus (EUBV)                     | Australia                | <i>An. farauti</i>            | [103]     |

|                                            |                          |                           |       |
|--------------------------------------------|--------------------------|---------------------------|-------|
| Near to Cache Valley virus                 | USA                      | <i>An. crucians</i>       | [105] |
| Aino virus (AINOV)                         | Taiwan                   | <i>Anopheles</i> spp.     | [104] |
| Barmah Forest virus (BFV)                  | Australia                | <i>An. amictus</i>        | [60]  |
| Ilheus virus (ILHV)                        | Brazil                   | <i>An. triannulatus</i>   | [131] |
| Potosi virus (POTV)                        | USA                      | <i>An. punctipennis</i>   | [132] |
| Bangui virus (BGIV)                        | Senegal                  | <i>An. pharoensis</i>     | [114] |
| Bozo virus (BOZOV)                         | Central African Republic | <i>An. funestus</i>       | [133] |
| Middelburg virus (MDIV)                    | Kenya                    | <i>An. coustani</i>       | [115] |
| Epizootic hemorrhagic disease virus (EHDV) | Indonesia                | <i>An. vagus</i>          | [129] |
| Wallal virus (WALV)                        | Australia                | <i>An. annulipes</i> s.l. | [59]  |
| Las Maloyas virus (LMV)                    | Argentina                | <i>An. albitarsis</i>     | [134] |
| Wesselsbron virus (WSLV)                   | Kenya                    | <i>An. coustani</i>       | [135] |
| Arumateua virus (ARTV)                     | Brazil                   | <i>Anopheles</i> spp.     | [127] |
| Western equine encephalitis virus (WEEV)   | USA                      | <i>An. punctipennis</i>   | [136] |
| Iguape virus (IGUV)                        | Brazil                   | <i>An. cruzii</i>         | [131] |
| Yellow fever virus (YFV)                   | Panama                   | <i>An. neivai</i>         | [137] |
| Stratford virus (STRV)                     | Australia                | <i>An. annulipes</i>      | [138] |
| Tahyna virus (TAHV)                        | Czech Republic           | <i>An. hyrcanus</i>       | [139] |
| Peruvian horse sickness virus (PHSV)       | Peru                     | <i>An. albimanus</i>      | [140] |

**Table S2.** Insect-Specific Viruses (ISVs) detected in wild-caught *Anopheles* mosquitoes worldwide.

| Virus name/ abbreviation    | Country   | <i>Anopheles</i> species     | References |
|-----------------------------|-----------|------------------------------|------------|
| Anopheles flavivirus (AnFV) | Angola    | <i>Anopheles</i> spp.        | [186]      |
|                             | Kenya     | <i>An. gambiae</i>           | [135]      |
|                             |           | <i>An. gambiae</i> s.l.      | [187]      |
|                             |           | <i>An. squamosus</i>         | [135]      |
|                             | Turkey    | <i>An. maculipennis</i> s.l. | [188]      |
| Karumba virus (KRBV)        | Australia | <i>An. meraukensis</i>       | [101,189]  |
| Dianke virus (DKV)          | Senegal   | <i>An. funestus</i>          | [190]      |
|                             |           | <i>An. gambiae</i>           | [190]      |
|                             |           | <i>An. pharoensis</i>        | [190]      |
|                             |           | <i>An. rufipes</i>           | [190]      |
| Xinzhou mosquito virus      | Cambodia  | <i>Anopheles</i> spp.        | [116]      |
|                             | China     | <i>An. sinensis</i>          | [191]      |
|                             | Senega    | <i>Anopheles</i> spp.        | [148]      |
| Culex flavivirus (CxFV)     | China     | <i>An. sinensis</i>          | [192]      |

|                                              |             |                                                               |          |
|----------------------------------------------|-------------|---------------------------------------------------------------|----------|
|                                              | Guinea/Mali | <i>Anopheles</i> spp.                                         | [193]    |
|                                              | Australia   | <i>An. annulipes</i> s.l.                                     | [59]     |
| Beaumont virus                               | Cambodia    | <i>Anopheles</i> spp.                                         | [116]    |
|                                              | Senegal     | <i>Anopheles</i> spp.                                         | [116]    |
|                                              | Cambodia    | <i>Anopheles</i> spp.                                         | [116]    |
| Xincheng mosquito virus                      | China       | <i>An. sinensis</i>                                           | [191]    |
|                                              | Senegal     | <i>Anopheles</i> spp.                                         | [116]    |
| Tanay virus (TANAV)                          | China       | <i>An. sinensis</i>                                           | [89,194] |
| Hubei mosquito virus 2 (HNV2)                | China       | <i>An. sinensis</i>                                           | [49,89]  |
|                                              | Cambodia    | <i>Anopheles</i> spp.                                         | [116]    |
| Wuhan mosquito virus 1                       | Senegal     | <i>Anopheles</i> spp.                                         | [116]    |
|                                              | Cambodia    | <i>Anopheles</i> spp.                                         | [116]    |
| Wuhan mosquito virus 9                       | Senegal     | <i>Anopheles</i> spp.                                         | [116]    |
|                                              | Guinea/Mali | <i>Anopheles</i> spp.                                         | [193]    |
| Anopheles flavivirus 1 (AnFV1)               | Liberia     | <i>An. gambiae</i>                                            | [195]    |
|                                              | Guinea/Mali | <i>Anopheles</i> spp.                                         | [193]    |
| Anopheles flavivirus 2 (AnFV2)               | Liberia     | <i>An. gambiae</i>                                            | [195]    |
|                                              | Cambodia    | <i>Anopheles</i> spp.                                         | [116]    |
| Culex tritaeniorhynchus rhabdovirus          | Senegal     | <i>Anopheles</i> spp.                                         | [116]    |
| Anopheles minimus iridovirus (AMIV)          | China       | <i>An. minimus</i>                                            | [50,196] |
|                                              | Brazil      | <i>An. lutzi</i>                                              | [197]    |
| Anopheles triannulatus orthopoxvirus (AtOPV) |             | <i>An. triannulatus</i>                                       | [198]    |
|                                              | Australia   | <i>An. annulipes</i> s.l.                                     | [199]    |
| Australian Anopheles totivirus (AATV)        |             | <i>An. hinesorum</i>                                          | [199]    |
|                                              | Cambodia    | <i>Anopheles</i> spp.                                         | [199]    |
| Phasi Charoen-like virus                     | Senegal     | <i>Anopheles</i> spp.                                         | [199]    |
| Dairy Swamp virus (DSwV)                     | Australia   | <i>An. bancroftii</i>                                         | [189]    |
| Aedes aegypti densovirus (AeDNV)             | China       | <i>Anopheles</i> spp.                                         | [200]    |
| American dog tick phlebovirus                | Senegal     | <i>Anopheles</i> spp.                                         | [199]    |
| Anopheles annulipes orbivirus (AAOV)         | Australia   | <i>An. annulipes</i> s.l.                                     | [199]    |
| Anopheles C virus (AnCV)                     | Senegal     | <i>An. gambiae</i> s.l.                                       | [185]    |
| Anopheles cypovirus (AnCPV)                  | Cambodia    | <i>An. gambiae</i> s.l.                                       | [185]    |
| Anopheles flavivirus-like sequences1         | Senegal     | <i>An. funestus</i> / <i>An. gambiae</i> / <i>An. rufipes</i> | [195]    |
| Anopheles flavivirus-like sequences2         | Senegal     | <i>An. funestus</i> / <i>An. gambiae</i> / <i>An. rufipes</i> | [195]    |
| Anopheles gambiae flavivirus (An(g)FV)       | Kenya       | <i>An. gambiae</i>                                            | [124]    |

|                                                |              |                                                               |       |
|------------------------------------------------|--------------|---------------------------------------------------------------|-------|
| Anopheles hinesorum orbivirus (AHOV)           | Australia    | <i>An. hinesorum</i>                                          | [199] |
| Anopheles marajoara virus (AnMV)               | Brazil       | <i>An. marajoara</i>                                          | [197] |
| Anopheles totivirus (AToV)                     | Liberia      | <i>An. gambiae</i>                                            | [195] |
| Anopheles-associated flavivirus (AAFV)         | China        | <i>An. sinensis</i>                                           | [201] |
| Anopheline-associated C virus (AACV)           | France       | <i>An. maculipennis</i> s.l.                                  | [202] |
| Beihai mantis shrimp virus 6                   | China        | <i>An. sinensis</i>                                           | [89]  |
| Bivens arm virus (BAV)                         | Cambodia     | <i>Anopheles</i> spp.                                         | [116] |
| Bolahun virus variant 1 (BOAV1)                | Liberia      | <i>An. gambiae</i>                                            | [195] |
| Bolahun virus variant 2 (BOAV2)                | Burkina Faso | <i>An. gambiae</i>                                            | [195] |
| Caraipé virus (CRPV)                           | Brazil       | <i>Anopheles</i> spp.                                         | [127] |
| Castlereia virus (CsV)                         | Australia    | <i>An. annulipes</i>                                          | [203] |
| Cerrado partiti-like-virus M1                  | Brazil       | <i>Anopheles</i> spp.                                         | [197] |
| Chapada dielmovirus                            | Brazil       | <i>Anopheles</i> spp.                                         | [197] |
| Coloiado-orthomyxo                             | Brazil       | <i>Anopheles</i> spp.                                         | [197] |
| Coot Bay virus (CBV)                           | USA          | <i>An. quadrimaculatus</i>                                    | [204] |
| Coxipo dielmovirus                             | Brazil       | <i>Anopheles</i> spp.                                         | [197] |
| Culex Bunyavirus 1                             | China        | <i>An. sinensis</i>                                           | [205] |
| Culex pipiens pallens densovirus (CppDNV)      | China        | <i>An. sinensis</i>                                           | [78]  |
| Culex pipiens-associated Tunisia virus (CpATV) | Vietnam      | <i>An. epiroticus</i>                                         | [206] |
| Daeseongdong virus 1                           | Senegal      | <i>Anopheles</i> spp.                                         | [116] |
| Eilat virus (EILV)                             | Israel       | <i>An. coustani</i>                                           | [207] |
| Gambie virus (GAMV)                            | Senegal      | <i>An. funestus</i> / <i>An. gambiae</i> / <i>An. rufipes</i> | [195] |
| Golok virus (GOLV)                             | Indonesia    | <i>An. subpictus</i>                                          | [129] |
| Haslams Creek virus (HaCV)                     | Australia    | <i>An. annulipes</i> s.l.                                     | [189] |
| Homalodisca vitripennis reovirus segment S3    | Senegal      | <i>Anopheles</i> spp.                                         | [116] |
| Ixodes scapularis associated virus 2           | Senegal      | <i>Anopheles</i> spp.                                         | [116] |
| Jaracatia flavivirus                           | Brazil       | <i>Anopheles</i> spp.                                         | [197] |
| Kampung Karu virus (KPKV)                      | Malaysia     | <i>An. tessellatus</i>                                        | [208] |
| Leanyer virus (LEAV)                           | Australia    | <i>An. meraukensis</i>                                        | [209] |
| Long Pine Key virus (LPKV)                     | USA          | <i>An. crucians</i>                                           | [208] |
| Loreto virus (LORV)                            | Peru         | <i>An. albimanus</i>                                          | [210] |
| Mac Peak virus (McPV)                          | Australia    | <i>An. farauti</i>                                            | [189] |

|                                  |           |                               |       |
|----------------------------------|-----------|-------------------------------|-------|
| Mosquito flavivirus              | Kenya     | <i>An. gambiae</i> s.l.       | [187] |
| Mosquito X virus (MXV)           | China     | <i>An. sinensis</i>           | [211] |
| Mujica picorna-like virus        | Brazil    | <i>Anopheles</i> spp.         | [197] |
| Murrumbidgee virus (MURBV)       | Australia | <i>An. annulipes</i> s.l.     | [59]  |
| Nam Dinh virus (NDiV)            | China     | <i>An. sinensis</i>           | [50]  |
| Negev virus (NEGV)               | Israel    | <i>An. coustani</i>           | [210] |
| Nienokoue virus (NiFV)           | Cambodia  | <i>Anopheles</i> spp.         | [116] |
| Oak-Vale virus (OVRV)            | Australia | <i>An. annulipes</i>          | [212] |
| Omono River virus                | Senegal   | <i>Anopheles</i> spp.         | [148] |
| Orbivirus-like sequences         | France    | <i>An. maculipennis</i> s.l.. | [202] |
| Planococcus citri densovirus     | China     | <i>An. sinensis</i>           | [89]  |
| Puerto Almendras virus (PTAMV)   | Cambodia  | <i>Anopheles</i> spp.         | [116] |
| Purunga orbivirus                | Brazil    | <i>Anopheles</i> spp.         | [197] |
| Quang Binh virus (QBV)           | China     | <i>An. sinensis</i>           | [75]  |
| Rio Chico virus (RCHV)           | Panamá    | <i>An. triannulatus</i>       | [204] |
| Sunn-hemp mosaic virus           | Senegal   | <i>Anopheles</i> spp.         | [116] |
| Tibet orbivirus (TIBOV)          | China     | <i>An. maculatus</i>          | [213] |
| Wuhan fly virus 1                | China     | <i>An. sinensis</i>           | [89]  |
| Wuhan mosquito virus 6           | China     | <i>An. sinensis</i>           | [205] |
| Wuhan spider virus               | Senegal   | <i>Anopheles</i> spp.         | [116] |
| Wutai mosquito phasivirus        | China     | <i>An. sinensis</i>           | [205] |
| Yunnan Culex flavivirus (YNCxFV) | China     | <i>An. sinensis</i>           | [214] |
| Yunnan Culex-related flavivirus  | China     | <i>An. sinensis</i>           | [50]  |
| Yunnan orbivirus (YUOV)          | China     | <i>An. sinensis</i>           | [50]  |

**Table S3.** Summary of laboratory studies that evaluated virus infection and transmission in *Anopheles* mosquitoes.

| Virus name/<br>abbreviation                      | Category              | <i>Anopheles</i> species   | Stage  | Infection Route/<br>virus dose                                              | Results of laboratory studies                                                                           | References |
|--------------------------------------------------|-----------------------|----------------------------|--------|-----------------------------------------------------------------------------|---------------------------------------------------------------------------------------------------------|------------|
| Aedes aegypti<br>dengue virus<br>(AeDENV)        | ISV                   | <i>An. gambiae</i>         | Larvae | OT/ 500 µl of a 1: 4<br>dilution of virus stock of<br>transducing particles | Infection 17%, but not disseminate<br>further anal papillae, TR not<br>determined                       | [156]      |
| Anopheles C virus<br>(AnCV)                      | ISV                   | <i>An. coluzzii</i>        | Adult  | OT, virus dose not<br>available                                             | Transovarial intraembryonic<br>transmission, infection, TR not<br>determined                            | [157]      |
| Anopheles<br>cypovirus<br>(AnCPV)                | ISV                   | <i>An. coluzzii</i>        | Adult  | OT, virus dose not<br>available                                             | Transovarial intraembryonic<br>transmission, infection, TR not<br>determined                            | [158]      |
| Anopheles<br>gambiae<br>dengue virus<br>(AgDENV) | ISV                   | <i>An. gambiae</i>         | Adult  | IT, 10 <sup>7</sup> viral genome<br>equivalents per ml<br>(vge/mL)          | Paratransgenesis, infection at 7 dpi,<br>venereal transmission in males, IR<br>and TR not determined    | [159]      |
|                                                  | ISV                   | <i>An. gambiae</i>         | Larvae | OT, virus dose not<br>available                                             | Paratransgenesis, infection,<br>dissemination and vertical<br>transmission, IR and TR not<br>determined | [160]      |
| Bunyamwera<br>virus (BUNV)                       | Probable<br>arbovirus | <i>An. gambiae</i>         | Adult  | BM, 10 <sup>10</sup> PFU/mL                                                 | IR 38%, transmission 71% at 14 dpi<br>(mice)                                                            | [144]      |
| Buttonwillow<br>virus (BUTV)                     | Arbovirus             | <i>An. freeborni</i>       | Adult  | OT, 107.9 PFU/mL                                                            | Infection 4/10, but no transmission<br>(rabbit)                                                         | [161]      |
| Bwamba virus<br>(BWAV)                           | Probable<br>arbovirus | <i>An. gambiae</i>         | Adult  | BM, 10 <sup>6.7</sup> PFU/mL                                                | Infection at 6 and 14 dpi (rates not<br>available), TR not determined                                   | [145]      |
| Cache Valley virus<br>(CVV)                      | Arbovirus             | <i>An. quadrimaculatus</i> | Adult  | BM, 10 <sup>5.2-6.2</sup> PFU/mL                                            | IR 100%, transmission 20% at 7 dpi;<br>IR 100%, transmission 33% at 14 dpi<br>(mice)                    | [142]      |
|                                                  |                       | <i>An. quadrimaculatus</i> | Adult  | BM, ICLD <sub>50</sub> (10 <sup>4.8</sup> )                                 | IR 100%, TR 0% at 10-19 dpi                                                                             | [143]      |
|                                                  |                       | <i>An. punctipennis</i>    | Adult  | BM, ICLD <sub>50</sub> (10 <sup>5.3</sup> )                                 | IR 85%, TR 30% at 14-18 dpi                                                                             | [143]      |



|                                          |           |                            |       |                                                            |                                                                                        |       |
|------------------------------------------|-----------|----------------------------|-------|------------------------------------------------------------|----------------------------------------------------------------------------------------|-------|
| Chikungunya virus (CHIKV)                | Arbovirus | <i>An. albimanus</i>       | Adult | BM, 10 <sup>8.0</sup> . TCID <sub>50</sub> /mL             | Infection 7/7 at 13 dpi, infection until 3 weeks dpi, transmission 0% (mice)           | [162] |
|                                          |           | <i>An. stephensi</i>       | Adult | BM, ICLD50 106.7 PFU/mL (post-infection)                   | IR 50% at 8 dpi, 54% at 10 dpi, effective transmission to mice (1/8)                   | [163] |
| Dianke virus (DKV)                       | ISV       | <i>An. gambiae</i>         | Adult | BM, 1.6 × 10 <sup>7</sup> copies/mL                        | Capable of disseminate virus at 20 dpi, but no transmission (saliva)                   | [164] |
| Eastern equine encephalitis virus (EEEV) | Arbovirus | <i>An. albimanus</i>       | Adult | BM, (10 <sup>7</sup> -10 <sup>8</sup> ) ICLD <sub>50</sub> | Infection rate not determined, transmission 100% at 7 dpi, 90% at 11 dpi (mice)        | [152] |
|                                          |           | <i>An. quadrimaculatus</i> | Adult | BM, (10 <sup>7</sup> -10 <sup>8</sup> ) ICLD <sub>50</sub> | Infection rate not determined, transmission 40% at 10 dpi, 50% at 11 dpi (mice)        | [152] |
|                                          |           | <i>An. quadrimaculatus</i> | Adult | BM, 10 <sup>6</sup> PFU/mL                                 | IR 54%, TR 13% at 7 dpi; IR 24%, TR 0% at 14 dpi (saliva)                              | [165] |
|                                          |           | <i>An. punctipennis</i>    | Adult | BM, 10 <sup>6</sup> PFU/mL                                 | IR 100% at 7 dpi and at 14 dpi, TR 0% at 7 dpi and at 14 dpi (saliva)                  | [165] |
| Eilat virus (EILV)                       | ISV       | <i>An. gambiae</i>         | Adult | IT, 10 <sup>7</sup> PFU/mL                                 | Infection only in posterior midgut at 7dpi, not disseminated, IR and TR not determined | [166] |
| Flock house virus (FHV)                  | ISV       | <i>An. gambiae</i>         | Adult | IT, 5X10 <sup>4</sup> –5X10 <sup>5</sup> PFU/mosquito      | Infection at 10 dpi, IR and TR not determined                                          | [167] |
|                                          |           | <i>An. gambiae</i>         | Adult | IT, 10 <sup>5.3</sup> 10 <sup>3.5</sup> PFU/mosquito       | Infection at 7 dpi and 10 dpi, IR and TR not determined                                | [168] |
|                                          |           | <i>An. stephensi</i>       | Adult | IT, 10 <sup>5.3</sup> 10 <sup>3.5</sup> PFU/mosquito       | Infection at 10 dpi, IR and TR not determined                                          | [168] |
| Friend murine leukemia virus (FLV)       | Other     | <i>An. stephensi</i>       | Adult | BM, virus dose not available                               | Infection at 78 hrs dpi, TR not determined                                             | [169] |
| Hepatitis B virus (HBV)                  | Other     | <i>An. stephensi</i>       | Adult | BM, 1,500 pg/mL                                            | IR 40% at 48 hrs dpi, but at 72 hrs dpi was negative, TR 0% (saliva)                   | [170] |

|                            |                    |                            |       |                                                                                       |                                                                                                 |       |
|----------------------------|--------------------|----------------------------|-------|---------------------------------------------------------------------------------------|-------------------------------------------------------------------------------------------------|-------|
| Mayaro virus (MAYV)        | Arbovirus          | <i>An. freeborni</i>       | Adult | BM, 10 <sup>6.8</sup> FFU/mL                                                          | IR 37%, TR 67% at 7 dpi; IR 0%, TR 0% at 14 dpi (saliva)                                        | [13]  |
|                            |                    | <i>An. quadrimaculatus</i> | Adult | BM, 10 <sup>7</sup> FFU/mL                                                            | IR 79%, TR 50% at 7 dpi; IR 100%, TR 0% at 14 dpi (saliva)                                      | [13]  |
|                            |                    | <i>An. stephensi</i>       | Adult | BM, 10 <sup>7</sup> FFU/mL                                                            | IR 71%, TR 12,5% at 7 dpi; IR 79%, TR 0% at 14 dpi (saliva)                                     | [13]  |
|                            |                    | <i>An. gambiae</i>         | Adult | BM, 10 <sup>7.1</sup> FFU/mL                                                          | IR 75%, TR 0% at 7 dpi; IR 100%, TR 100% at 14 dpi (saliva)                                     | [13]  |
|                            |                    | <i>An. quadrimaculatus</i> | Adult | BM, 10 <sup>7.87-10<sup>8.39</sup></sup> PFU/mL                                       | IR 82%, TR 25% at 7 dpi; IR 74%, TR 48% at 14 dpi (saliva)                                      | [171] |
| Myxoma virus (MYXV)        | Other              | <i>An. atroparvus</i>      | Adult | BM rabbit, virus dose not available                                                   | Vector can retain its infectivity for periods up to 220 dpi, and it can infect rabbits          | [154] |
| Ngari virus (NRIV)         | Arbovirus          | <i>An. gambiae</i>         | Adult | BM, 1010 PFU/mL                                                                       | IR 38% 14 dpi, transmission 100% (mice)                                                         | [144] |
| Northway virus (NORV)      | Probable arbovirus | <i>An. freeborni</i>       | Adult | IT, 10 <sup>3.2</sup> PFU/mosquito                                                    | IR 35% (dpi not available), TR 14% at 7-23 dpi (saliva)                                         | [172] |
| O'nyong'nyong virus (ONNV) | Arbovirus          | <i>An. gambiae</i>         | Adult | BM, 10 <sup>5.0-6.9</sup> PFU/mL                                                      | IR 75% at 7 dpi with recombinant virus, TR not determined                                       | [4]   |
|                            |                    | <i>An. gambiae</i>         | Adult | BM, 10 <sup>5.5</sup> PFU/mL                                                          | Infection, IR not available, TR not determined                                                  | [146] |
|                            |                    | <i>An. gambiae</i>         | Adult | IT, 10 <sup>1-10<sup>3.5</sup></sup> PFU/mL; BM 10 <sup>2-10<sup>5</sup></sup> PFU/mL | Limited infection and spread, with no differences between transgenic and wild mosquitoes, TR 0% | [147] |
|                            |                    | <i>An. gambiae</i>         | Adult | BM, 10 <sup>5.0-10<sup>5.5</sup></sup> PFU/mL                                         | IR 78%, DR 15% at 6 dpi; IR 84%, DR 25% at 8 dpi of recombinant virus, TR not determined        | [148] |
|                            |                    | <i>An. gambiae</i>         | Adult | BM, 10 <sup>5.0-10<sup>5.5</sup></sup> TCID <sub>50</sub> /mL                         | IR 75%, TR 0% at 7 dpi; IR 95%, TR 57% at 14 dpi (saliva)                                       | [149] |

|                                       |                    |                                   |        |                                                  |                                                                                                                                        |       |
|---------------------------------------|--------------------|-----------------------------------|--------|--------------------------------------------------|----------------------------------------------------------------------------------------------------------------------------------------|-------|
| Rift Valley fever virus (RVFV)        | Arbovirus          | <i>An. bradley-crucians</i>       | Adult  | IT, 10 <sup>1.6</sup> PFU/mL                     | IR 83%, transmission 0% at 14 dpi (Hamster)                                                                                            | [173] |
|                                       |                    | <i>An. stephensi</i>              | Larvae | IT, 10 <sup>2</sup> PFU/mL                       | IR not available, transmission 83% at 7-10 dpi (hamster), when the virus is inoculated as an adult, none of the mosquitoes transmit it | [174] |
|                                       |                    | <i>An. coustani</i>               | Adult  | BM, 2.25 × 10 <sup>8</sup> PFU/mL                | IR 50%, TR 100% at 8 dpi (saliva)                                                                                                      | [150] |
|                                       |                    | <i>An. stephensi</i>              | Adult  | IT, 10 <sup>2</sup> PFU/mL                       | IR 46%, transmission RVFV (hamster) (co-infection RVFV and sporozoite of <i>Plasmodium berghei</i> )                                   | [175] |
| Saint Louis encephalitis virus (SLEV) | Arbovirus          | <i>An. quadrimaculatus</i>        | Adult  | BM, virus dose not available                     | Infection (IR not determined), transmission 0% (mice, monkey)                                                                          | [151] |
|                                       |                    | <i>An. maculipennis freeborni</i> | Adult  | BM, virus dose not available                     | Infection (IR not determined), transmission 0% at 8 dpi                                                                                | [176] |
| Semliki Forest virus (SFV)            | Arbovirus          | <i>An. albimanus</i>              | Adult  | BM, initial virus dose not available             | IR not determined, transmission 24% at 14 dpi (mice)                                                                                   | [177] |
|                                       |                    | <i>An. albimanus</i>              | Adult  | BM, 10 <sup>5.9</sup> ICLD <sub>50</sub> /mL     | IR 92% at 10 dpi; transmission to mice                                                                                                 | [178] |
|                                       |                    | <i>An. quadrimaculatus</i>        | Adult  | BM, 10 <sup>6.7</sup> ICLD <sub>50</sub> /mL     | IR 100% at 10 dpi; transmission to mice                                                                                                | [178] |
|                                       |                    | <i>An. freeborni</i>              | Adult  | BM, 10 <sup>3.0-4.1</sup> ICLD <sub>50</sub> /mL | Transmission at 12 dpi (4/12 mice)                                                                                                     | [179] |
|                                       |                    | <i>An. stephensi</i>              | Adult  | BM, 10 <sup>4.3-5.0</sup> ICLD <sub>50</sub> /mL | Transmission at 13 dpi (10/10 mice)                                                                                                    | [179] |
|                                       |                    | <i>An. atroparvus</i>             | Adult  | BM, 10 <sup>5.7-6.2</sup> ICLD <sub>50</sub> /mL | Transmission at 10 dpi (4/20 mice)                                                                                                     | [179] |
|                                       |                    | <i>An. sudaicus</i>               | Adult  | BM, 10 <sup>5.2-5.6</sup> ICLD <sub>50</sub> /mL | Transmission at 10 dpi (3/15 mice)                                                                                                     | [179] |
| Sindbis virus (SINV)                  | Arbovirus          | <i>An. albimanus</i>              | Adult  | BM, virus dose not available                     | Transmission at 14 dpi (10/10 mice)                                                                                                    | [180] |
|                                       |                    | <i>An. freeborni</i>              | Adult  | IT, 100-1000 PFU                                 | Infection, but low virus levels, IR and TR not determined                                                                              | [181] |
| Sunguru virus (SUNV)                  | Probable arbovirus | <i>An. gambiae</i>                | Adult  | BM, 10 <sup>5.5</sup> PFU/mL                     | IR 47%, TR 0% (saliva)                                                                                                                 | [182] |

|                                                      |           |                            |        |                                                  |                                                                  |       |
|------------------------------------------------------|-----------|----------------------------|--------|--------------------------------------------------|------------------------------------------------------------------|-------|
| Tensaw virus<br>(TENV)                               | Arbovirus | <i>An. quadrimaculatus</i> | Adult  | BM, 10 <sup>4.1</sup> ICLD <sub>50</sub> /mL     | IR 100% at 10 and 20 dpi,<br>transmission at 14 dpi (3/15 mice)  | [141] |
|                                                      |           | <i>An. albimanus</i>       | Adult  | BM, 10 <sup>3.9</sup> ICLD <sub>50</sub> /mL     | IR 94% at 12 dpi, transmission at 12<br>dpi (4/13 mice)          | [141] |
|                                                      |           | <i>An. maculatus</i>       | Adult  | BM, 10 <sup>2.9-4.0</sup> ICLD <sub>50</sub> /mL | IR 100% at 6 dpi, transmission 0%<br>(mice)                      | [141] |
| Thai-strain<br>densovirus<br>(AThDNV)                | ISV       | <i>An. minimus</i>         | Larvae | OT, virus dose not<br>available                  | Infection and vertical transmission, IR<br>and TR not determined | [183] |
| Venezuelan<br>equine<br>encephalitis virus<br>(VEEV) | Arbovirus | <i>An. albimanus</i>       | Adult  | BM, 10 <sup>7.2</sup> LD <sub>50</sub> /mL       | Infection until 13 dpi, transmission at<br>14 dpi (1/6 mice)     | [184] |

**Abbreviations:** **ISV**, Insect-Specific Virus; **BM**, mosquitoes were infected by infectious blood-meal; **IT**, mosquitoes were infected by intrathoracic inoculation; **OT**, mosquito were infected by other via; **PFU**, Plaque forming units; **FFU**, Focus forming units; **vge**, viral genome equivalents; **TCID<sub>50</sub>**, tissue culture infectious dose 50%; **ICLD<sub>50</sub>**, intracerebral lethal dose 50%; **LD**, lethal dose, 50%; **IR**, Infection rate is the percentage of engorged females with viral particles in the body; **DR**, Dissemination rate is the percentage of engorged females with viral particles in legs/wings; **TR**, Transmission rate is calculated as percentage of engorged females with viral particles in the saliva/ salivary glands; **dpi**, days post-infection; **hrs**, hours.

\*The results presented in this table reflect those reported in the studies with no modifications.
